# Supplementary material for: InterMEL: An international biorepository and clinical database to uncover predictors of survival in early-stage melanoma
Source: PubMed Central journal article supplement (PMC10069769; doi:10.1371/journal.pone.0269324), 2023-04-03
Supplement: pone.0269324.s001.pdf [file pone.0269324.s001.pdf]

**Supporting Table S1.** InterMEL: Participants and melanoma variables and definitions

| InterMEL Variable      | Definition                                      | Value type  | Code                                                                                                                                                                                                         | Required? | Notes                                                                                                                                                                                                                              | Responsible Data Source                                                                                               |
|------------------------|-------------------------------------------------|-------------|--------------------------------------------------------------------------------------------------------------------------------------------------------------------------------------------------------------|-----------|------------------------------------------------------------------------------------------------------------------------------------------------------------------------------------------------------------------------------------|-----------------------------------------------------------------------------------------------------------------------|
| MELID                  | Patient ID                                      | Unique ID   | IML-[Center Code]### or IML-[Center Code]###N<br><br>Center Codes:<br>CCF = 1, CW = 2, DTM = 3, MDA= 4, MIA = 5, MSK = 6, NYU = 7, UNC = 8, Yal = 9                                                          | Y         | Example:<br>IML-5001 or IML-5001N<br>The first number is the center code (IML-5001), the following 3 numbers are for the specific patient assigned in sequential order (IML-5001). An "N" at the end indicates Normal (IML-5001N). | Center PI sending tumors is responsible to make up the MELID, using IML-center number, patient number, and N or blank |
| GROUP                  | Comparison Group                                | Number Code | 0 = Died from melanoma within 5 years of diagnosis<br>1 = Lived more than 5 years after diagnosis                                                                                                            | Y         |                                                                                                                                                                                                                                    | Center PI                                                                                                             |
| YEAR_DX                | Year of diagnosis of the first primary          | Integer     | YYYY                                                                                                                                                                                                         | Y         | Format YYYY                                                                                                                                                                                                                        | Center PI                                                                                                             |
| VITAL_STATUS           | Vital status at the last contact                | Number Code | 1 = Alive<br>2 = Dead of melanoma<br>3 = Dead of other causes<br>4 = Dead of unknown causes<br>99 = Unknown/ Missing                                                                                         | Y         | Alive includes 'Alive w/ Melanoma' and 'Alive w/o Melanoma'<br>[Eligibility: Must have died within 5 years of diagnosis and those who lived more than 5 years after diagnosis without recurrence]                                  | Center PI                                                                                                             |
| VITAL_STATUS_DATE      | The last follow up date or date of death        | Date        | MM/DD/YYYY                                                                                                                                                                                                   | Y         | If month unknown use '00', if date unknown use '00', if entire date unknown type 'UNK'. Will be reconciled to '06' or '15' respectively during data cleaning.                                                                      | Center PI                                                                                                             |
| vital_status_source    | Source of Vital status                          | Number Code | 1 = Physician's Office/Private Medical Practitioner (LMD)<br>2 = Death Certificate (i.e. NDI)<br>3 = Other clinical information<br>99 = Unknown/ Missing                                                     |           |                                                                                                                                                                                                                                    | Center PI                                                                                                             |
| vital_status_source_os | Specify other source                            | Text        |                                                                                                                                                                                                              |           |                                                                                                                                                                                                                                    |                                                                                                                       |
| FUDAYS                 | Number of days from diagnosis to last follow-up | Integer     | [CALCULATED]                                                                                                                                                                                                 | Y         | Calculated variable of YEARDX and VITALSTATUSDATE                                                                                                                                                                                  | Center PI                                                                                                             |
| MULT_PRIMARY           | Multiple primary of melanoma                    | Number Code | 0 = No<br>1 = Yes<br>99 = Unknown/ Missing                                                                                                                                                                   | Y         | [Eligibility: The first primary invasive melanoma is eligible, without regard for subsequent melanomas, if synchronous select deeper]                                                                                              | Center PI                                                                                                             |
| AGE_AT_DX              | Age at diagnosis                                | Integer     |                                                                                                                                                                                                              | Y         |                                                                                                                                                                                                                                    | Center PI                                                                                                             |
| SEX                    | Sex                                             | Number Code | 1 = Male<br>2 = Female<br>99 = Unknown/ Missing                                                                                                                                                              | Y         | [Eligibility: Must equal 1 or 2, Unknown/ Missing not eligible]                                                                                                                                                                    | Center PI                                                                                                             |
| race                   | Race                                            | Number Code | 1 = White<br>2 = Asian<br>3 = American Indian/Alaska Native<br>4 = Black or African American<br>5 =Native Hawaiian or Other Pacific Islander<br>6 = More than one race<br>7 = Other<br>99 = Unknown/ Missing |           |                                                                                                                                                                                                                                    | Center PI                                                                                                             |

**Supporting Table S1.** InterMEL: Participants and melanoma variables and definitions

| InterMEL Variable | Definition                                               | Value type  | Code                                                                                                                                                                                                                                                                                                                                                                                                                                                                                                                                                                                                                                                                                                                                                           | Required? | Notes                                                                                                                                                                                                                                                                                                            | Responsible Data Source |
|-------------------|----------------------------------------------------------|-------------|----------------------------------------------------------------------------------------------------------------------------------------------------------------------------------------------------------------------------------------------------------------------------------------------------------------------------------------------------------------------------------------------------------------------------------------------------------------------------------------------------------------------------------------------------------------------------------------------------------------------------------------------------------------------------------------------------------------------------------------------------------------|-----------|------------------------------------------------------------------------------------------------------------------------------------------------------------------------------------------------------------------------------------------------------------------------------------------------------------------|-------------------------|
| ethnicity         | Ethnicity (when possible)                                | Number Code | 1 = Hispanic<br>2 = Non-Hispanic<br>99 = Unknown/ Missing                                                                                                                                                                                                                                                                                                                                                                                                                                                                                                                                                                                                                                                                                                      |           |                                                                                                                                                                                                                                                                                                                  | Center PI               |
| STAGE_AJCC8       | Pathological staging at time of diagnosis based on AJCC8 | Number Code | 1 = II<br>2 = IIA<br>3 = IIB<br>4 = IIC<br>5 = III<br>6 = IIIA<br>7 = IIIB<br>8 = IIIC<br>9 = IIID                                                                                                                                                                                                                                                                                                                                                                                                                                                                                                                                                                                                                                                             | Y         | Note, with Breslow thickness, mitotic rate, and ulceration, we can assign T stage to any tumor using any system.[Eligibility: Tumors should be 1.00 mm (1-2.00 with ulceration) or more. No distant metastases at diagnosis.]. AJCC8 added microsatellites, microsatellites and in-transit mets to nodal status. | Center PI               |
| stage_T_ajcc8     | AJCC8 TNM staging - T (as available)                     | Number Code | 0 = T0: No evidence of primary tumor/or site of primary tumor is unknown'<br>1 = T1: ≤ 1.0mm, unkwn ulceration [Not Eligible];<br>2 = T1a: <0.8mm, w/o ulceration [Not Eligible];<br>3 = T1b: <0.8mm, w/ ulceration or 0.8-1.0mm w/ or w/o ulceration [Not Eligible];<br>4 = T2: >1.0-2.0mm, unkwn ulceration;<br>5 = T2a: >1.0mm-2.0 mm, w/o ulceration;<br>6 = T2b: >1.0mm-2.0 mm, w/ ulceration;<br>7 = T3: >2.0-4.0mm, unkwn ulceration;<br>8 = T3a: >2.0mm-4.0mm, w/o ulceration;<br>9 = T3b: >2.0mm-4.0mm, w/ ulceration;<br>10 = T4: >4.0mm, unkwn ulceration<br>11 = T4a: >4.0 mm, w/o ulceration;<br>12 = T4b: > 4.0 mm, w/ ulceration;<br>13 = Tis: Melanoma in situ<br>98 = TX: Primary tumor thickness cannot be assessed<br>99 = Unknown/ Missing | Y         | [Eligibility: Tumors should be 1.00 mm (1-2.00 with ulceration) or more.]                                                                                                                                                                                                                                        | Center PI               |

**Supporting Table S1.** InterMEL: Participants and melanoma variables and definitions

| InterMEL Variable | Definition                           | Value type  | Code                                                                                                                                                                                                                                                                                                                                                                                                                                                                                                                                                                                                                                                                                                                                                                                                                                                                                                                                                                                                                                                                                                                                                                                                                                                                                                                                                                                                                                                                                                                                                                                                                | Required? | Notes                                                                                                                                    | Responsible Data Source |
|-------------------|--------------------------------------|-------------|---------------------------------------------------------------------------------------------------------------------------------------------------------------------------------------------------------------------------------------------------------------------------------------------------------------------------------------------------------------------------------------------------------------------------------------------------------------------------------------------------------------------------------------------------------------------------------------------------------------------------------------------------------------------------------------------------------------------------------------------------------------------------------------------------------------------------------------------------------------------------------------------------------------------------------------------------------------------------------------------------------------------------------------------------------------------------------------------------------------------------------------------------------------------------------------------------------------------------------------------------------------------------------------------------------------------------------------------------------------------------------------------------------------------------------------------------------------------------------------------------------------------------------------------------------------------------------------------------------------------|-----------|------------------------------------------------------------------------------------------------------------------------------------------|-------------------------|
| stage_N_ajcc8     | AJCC8 TNM staging - N (as available) | Number Code | 0 = N0: No spread to nearby lymph nodes<br>1 = N1: one tumor-involved node or any number of in-transit, satellite, and/or microsatellite metastases with no tumor-involved nodes<br>2 = N1a: One clinically occult (i.e., detected by SLN biopsy)<br>3 = N1b: one clinically detected<br>4 = N1c: no regional lymph node disease, but with presence of in-transit, satellite and/or microsatellite metastases<br>5 = N2: Two or three tumor-involved nodes or any number of i-transit, satellite, and/or microsatellite metastases with one tumor-involved node<br>6 = N2a: Two or three clinically occult (i.e., detected by SLN biopsy)<br>7 = N2b: Two or three, at least one of which was clinically detected<br>8 = N2c: One clinically occult or clinically detected LN, with the presence of in-transit, satellite, and/or microsatellite metastases<br>9 = N3: Four or more tumor-involved node or any number of in-transit, satellite, and/or microsatellite metastases with two or more tumor-involved nodes, or any number of matted nodes without or with in-transit, satellite, and/or microsatellite metastases<br>10 = N3a: Four or more clinically occult (i.e., detected by SLN biopsy)<br>11 = N3b: Four or more, at least one of which was clinically detected., or presence of any number of matted nodes<br>12 = N3c: Two or more clinically occult or clinically detected and/or presence of any number of matted nodes as well as presence of in-transit, satellite, and/or microsatellite metastases.<br>98 = NX: Nearby (regional) lymph nodes cannot be assessed<br>99 = Unknown/ Missing | Y         | Provide as much information on Lymph node status (clinically palpable or through SLN) as possible. See SLN_status for neagtive/positive. | Center PI               |
| stage_M_ajcc8     | AJCC8 TNM staging - M (as available) | Number Code | 0 = M0 - No distant metastasis<br>1 = M1a [Not Eligible]<br>2 = M1b [Not Eligible]<br>3 = M1c [Not Eligible]<br>4 = M1d [Not Eligible]<br>99 = Unknown/ Missing                                                                                                                                                                                                                                                                                                                                                                                                                                                                                                                                                                                                                                                                                                                                                                                                                                                                                                                                                                                                                                                                                                                                                                                                                                                                                                                                                                                                                                                     | Y         | [Eligibility: M1/Stage IV not eligible]                                                                                                  | Center PI               |
| initial_breslow   | Breslow Thickness (mm)               | Number      | [999 if Missing]                                                                                                                                                                                                                                                                                                                                                                                                                                                                                                                                                                                                                                                                                                                                                                                                                                                                                                                                                                                                                                                                                                                                                                                                                                                                                                                                                                                                                                                                                                                                                                                                    |           |                                                                                                                                          | Center PI               |

**Supporting Table S1.** InterMEL: Participants and melanoma variables and definitions

| InterMEL Variable               | Definition                                                                                                                        | Value type          | Code                                                                                                                                                                                                                                                                                                                                                                                               | Required? | Notes                                                                                                                                                                                                                                                                                                                                                                                                                       | Responsible Data Source |
|---------------------------------|-----------------------------------------------------------------------------------------------------------------------------------|---------------------|----------------------------------------------------------------------------------------------------------------------------------------------------------------------------------------------------------------------------------------------------------------------------------------------------------------------------------------------------------------------------------------------------|-----------|-----------------------------------------------------------------------------------------------------------------------------------------------------------------------------------------------------------------------------------------------------------------------------------------------------------------------------------------------------------------------------------------------------------------------------|-------------------------|
| initial_ulceration              | Presence of ulceration - yes/no                                                                                                   | Number Code         | 1= Absent<br>2= Present<br>3 = Indeterminate<br>99 = Unknown/ Missing                                                                                                                                                                                                                                                                                                                              |           |                                                                                                                                                                                                                                                                                                                                                                                                                             | Center PI               |
| <b>PRIMARY_TUMOR_SITE</b>       | Primary tumor location - body site (ICD-O- Number Code 3 SITE CODES)                                                              |                     | 0 = C44.0 Skin of lip, NOS<br>1 = C44.1 Eyelid<br>2 = C44.2 External ear<br>3 = C44.3 Skin of other and unspecified parts of face<br>4 = C44.4 Skin of scalp and neck<br>5 = C44.5 Skin of trunk<br>6 = C44.6 Skin of upper limb and shoulder<br>7 = C44.7 Skin of lower limb and hip (Including buttocks)<br>8 = C44.8 Overlapping lesion of skin<br>9 = C44.9 Skin, NOS<br>99 = Unknown/ Missing | Y         | <a href="https://training.seer.cancer.gov/melanoma/abstract-code-stage/codes.html">https://training.seer.cancer.gov/melanoma/abstract-code-stage/codes.html</a> - we will make a note for the very rare cutaneous genital sites and code as C44.9, NOS                                                                                                                                                                      | Center PI               |
| tumor_burden                    | Size (mm) of size of the largest tumour deposit                                                                                   | Number              | 99 = Unknown/ Missing                                                                                                                                                                                                                                                                                                                                                                              |           | Provide if possible. The recorded measurements should be the size of the largest tumour deposit (not the size of the involved lymph node, under less it is entirely replaced by tumour). (The size of the largest metastasis within sentinel lymph nodes is a strong predictor of the presence of additional positive non-sentinel lymph nodes within the lymph node basin and also a strong predictor of survival/outcome) | Center PI               |
| SLN_status                      | SLN evaluation status                                                                                                             | Number Code         | 1 = Negative<br>2 = Positive<br>99 = Unknown/ Missing                                                                                                                                                                                                                                                                                                                                              |           | Result of sentinel lymph node biopsy or fine-needle aspiration. Result detail is in the field stage_N ajcc8                                                                                                                                                                                                                                                                                                                 | Center PI               |
| tumor_subtype                   | Tumor subtype (if known)                                                                                                          | Number Code         | 1 = BRAF positive<br>2 = NRAS positive<br>3 = Both BRAF and NRAS<br>4 = Neither BRAF or NRAS<br>5 = Other mutation<br>98 = Not Assessed<br>99 = Unknown/ Missing                                                                                                                                                                                                                                   |           |                                                                                                                                                                                                                                                                                                                                                                                                                             | Center PI               |
| tumor_subtype_os<br>progression | Other Tumor subtype (specify)<br>Evidence of progression - Progressive disease noted prior to or during first course of treatment | Text<br>Number Code | 1 = Yes<br>2 = No<br>99 = Unknown/ Missing                                                                                                                                                                                                                                                                                                                                                         |           | Based on NCI Definition: Becomes worse (stage) or spreads in the body (metastasizes)                                                                                                                                                                                                                                                                                                                                        | Center PI<br>Center PI  |
| progression_date                | Date of progression                                                                                                               | Date                | MM/DD/YYYY                                                                                                                                                                                                                                                                                                                                                                                         |           | If month unknown use '00' , if date unknown use '00', If entire date unknown type 'UNK'. Will be reconciled to '06' or '15' respectively during data cleaning.                                                                                                                                                                                                                                                              | Center PI               |

**Supporting Table S1.** InterMEL: Participants and melanoma variables and definitions

| InterMEL Variable      | Definition                                                                                                              | Value type  | Code                                       | Required? | Notes                                                                                                                                                                                                                                                                                                                             | Responsible Data Source |
|------------------------|-------------------------------------------------------------------------------------------------------------------------|-------------|--------------------------------------------|-----------|-----------------------------------------------------------------------------------------------------------------------------------------------------------------------------------------------------------------------------------------------------------------------------------------------------------------------------------|-------------------------|
| recurrence             | Recurrence - After curative treatment and an observed disease free-interval period (see additional definition in notes) | Number Code | 1 = Yes<br>2 = No<br>99 = Unknown/ Missing |           | Based on NCI Definition: Melanoma that has recurred (come back), usually after a period of time during which the melanoma could not be detected. The melanoma may come back to the same place as the original (primary) tumor or to another site. However, the stage will not have changed and there will be no organ metastases. | Center PI               |
| recurrence_date        | Recurrence date (if known)                                                                                              | Date        | MM/DD/YYYY                                 |           | If month unknown use '00', if date unknown use '00', If entire date unknown type 'UNK'. Will be reconciled to '06' or '15' respectively during data cleaning.                                                                                                                                                                     | Center PI               |
| recurrence_site        | Anatomic site or recurrence                                                                                             | Text        | [Describe the site of recurrence]          |           |                                                                                                                                                                                                                                                                                                                                   | Center PI               |
| AntiMEK_inhibitor      | Treatment with Vemurafenib, Dabrafenib Cobimetinib, trametinib?                                                         | Number Code | 1 = Yes<br>2 = No<br>99 = Unknown/ Missing |           |                                                                                                                                                                                                                                                                                                                                   | Center PI               |
| AntiMEK_inhibitor_date | Treatment date if known                                                                                                 | Date        | MM/DD/YYYY                                 |           | If month unknown use '00', if date unknown use '00', If entire date unknown type 'UNK'. Will be reconciled to '06' or '15' respectively during data cleaning.                                                                                                                                                                     | Center PI               |
| ipilimumab             | Treatment with Ipilimumab?                                                                                              | Number Code | 1 = Yes<br>2 = No<br>99 = Unknown/ Missing |           |                                                                                                                                                                                                                                                                                                                                   | Center PI               |
| ipilimumab_date        | Treatment date if known                                                                                                 | Date        | MM/DD/YYYY                                 |           | If month unknown use '00', if date unknown use '00', If entire date unknown type 'UNK'. Will be reconciled to '06' or '15' respectively during data cleaning.                                                                                                                                                                     | Center PI               |
| antiPD_1               | Treatment with Anti-PD1 (Nivolumab, pembrolizumab)?                                                                     | Number Code | 1 = Yes<br>2 = No<br>99 = Unknown/ Missing |           |                                                                                                                                                                                                                                                                                                                                   | Center PI               |
| antiPD_1_date          | Treatment date if known                                                                                                 | Date        | MM/DD/YYYY                                 |           | If month unknown use '00', if date unknown use '00', If entire date unknown type 'UNK'. Will be reconciled to '06' or '15' respectively during data cleaning.                                                                                                                                                                     | Center PI               |
| interferon             | Treatment with Interferon?                                                                                              | Number Code | 1 = Yes<br>2 = No<br>99 = Unknown/ Missing |           |                                                                                                                                                                                                                                                                                                                                   | Center PI               |
| interferon_date        | Treatment date if known                                                                                                 | Date        | MM/DD/YYYY                                 |           | If month unknown use '00', if date unknown use '00', If entire date unknown type 'UNK'. Will be reconciled to '06' or '15' respectively during data cleaning.                                                                                                                                                                     | Center PI               |
| other_treatment        | Other Treatment                                                                                                         | Number Code | 1 = Yes<br>2 = No<br>99 = Unknown/ Missing |           |                                                                                                                                                                                                                                                                                                                                   | Center PI               |
| other_treatment_os     | Other Treatment (specify)                                                                                               | Text        |                                            |           |                                                                                                                                                                                                                                                                                                                                   | Center PI               |

**Supporting Table S1.** InterMEL: Participants and melanoma variables and definitions

| InterMEL Variable    | Definition                           | Value type  | Code                                                                                                                                                                                                                                                                                                                                                                                           | Required? | Notes                                                                                                                                                                     | Responsible Data Source                           |
|----------------------|--------------------------------------|-------------|------------------------------------------------------------------------------------------------------------------------------------------------------------------------------------------------------------------------------------------------------------------------------------------------------------------------------------------------------------------------------------------------|-----------|---------------------------------------------------------------------------------------------------------------------------------------------------------------------------|---------------------------------------------------|
| other_treatment_date | Treatment date if known              | Date        | MM/DD/YYYY                                                                                                                                                                                                                                                                                                                                                                                     |           | If month unknown use '00', if date unknown use '00', If entire date unknown type 'UNK'. Will be reconciled to '06' or '15' respectively during data cleaning.             | Center PI                                         |
| height               | Height at diagnosis                  | Number      | 999 = Unknown/ Missing                                                                                                                                                                                                                                                                                                                                                                         |           | Inches or Centimeters ONLY                                                                                                                                                | Center PI                                         |
| height_unit          | Units for Height at Dx               | Number Code | 1 = Inches (in)<br>2 = Centimeters (cm)                                                                                                                                                                                                                                                                                                                                                        |           | Specify Units                                                                                                                                                             | Center PI                                         |
| weight               | Weight at diagnosis                  | Number      | 999 = Unknown/ Missing                                                                                                                                                                                                                                                                                                                                                                         |           | Pounds or Kilograms ONLY                                                                                                                                                  | Center PI                                         |
| weight_unit          | Units for Weight at Dx               | Number Code | 1 = Pounds (lb)<br>2 = Kilograms (kg)                                                                                                                                                                                                                                                                                                                                                          |           | (NOTE: Missing is set to 999 due to biologically plausible value for 99kg)<br>Specify Units                                                                               | Center PI                                         |
| bmi                  | BMI (kg/m^2) at diagnosis            | Number      | 99 = Unknown/ Missing                                                                                                                                                                                                                                                                                                                                                                          |           | Calculated variable using HEIGHT and WEIGHT                                                                                                                               | Center PI                                         |
| center_notes         | Additional notes from Center         | Note Field  |                                                                                                                                                                                                                                                                                                                                                                                                |           |                                                                                                                                                                           | Center PI                                         |
| path_id              | Pathology Record [Auto Populated]    | Number      |                                                                                                                                                                                                                                                                                                                                                                                                |           | Automatically Generated                                                                                                                                                   | Dermatopathologist/Core 2 via REDCap Entry System |
| path_date            | Date Assessed                        | Date        | MM/DD/YYYY                                                                                                                                                                                                                                                                                                                                                                                     |           |                                                                                                                                                                           | Dermatopathologist/Core 2 via REDCap Entry System |
| path_initials        | Pathologist Initials                 | Number Code | 1 = KB<br>2 = CL                                                                                                                                                                                                                                                                                                                                                                               |           |                                                                                                                                                                           | Dermatopathologist/Core 2 via REDCap Entry System |
| specimen             | Specimen Type                        | Number Code | 1 = Biopsy<br>2 = Excision                                                                                                                                                                                                                                                                                                                                                                     |           |                                                                                                                                                                           | Dermatopathologist/Core 2 via REDCap Entry System |
| hist                 | Histology (ICD-O-3 Morphology Codes) | Number Code | 1 = Malignant Melanoma, NOS (8720/3)<br>2 = Nodular Melanoma (8721/3)<br>3 = Malignant Melanoma, Regressing (8723/3)<br>4 = Amelanotic Melanoma (8730/3)<br>5 = Lentigo Maligna Melanoma (8742/3)<br>6 = Superficial Spreading Melanoma (8743/3)<br>7 = Acral Lentiginous Melanoma (8744/3)<br>8 = Desmoplastic Melanoma (8745/3)<br>9 = Mixed<br>10 = Other, Specify<br>99 = Unknown/ Missing |           | <a href="https://training.seer.cancer.gov/melanoma/abstract-code-stage/morphology.html">https://training.seer.cancer.gov/melanoma/abstract-code-stage/morphology.html</a> | Dermatopathologist/Core 2 via REDCap Entry System |
| hist_os              | Histology - Other, Specify           | Text        |                                                                                                                                                                                                                                                                                                                                                                                                |           | Describe other histologic code                                                                                                                                            | Dermatopathologist/Core 2 via REDCap Entry System |
| thickness            | Breslow Thickness (mm)               | Number      | [999 if Missing]                                                                                                                                                                                                                                                                                                                                                                               |           |                                                                                                                                                                           | Dermatopathologist/Core 2 via REDCap Entry System |
| clarklevel           | Clark Level                          | Number Code | 1 = I<br>2 = II<br>3 = III<br>4 = IV<br>5 = V                                                                                                                                                                                                                                                                                                                                                  |           |                                                                                                                                                                           | Dermatopathologist/Core 2 via REDCap Entry System |
| mitoses              | Presence of mitoses?                 | Number Code | 0 = Absent<br>1 = Present<br>99 = Cannot assess                                                                                                                                                                                                                                                                                                                                                |           |                                                                                                                                                                           | Dermatopathologist/Core 2 via REDCap Entry System |
| mit_index_mm         | Present Mitotic Index (#/mm2)        | Number      |                                                                                                                                                                                                                                                                                                                                                                                                |           |                                                                                                                                                                           | Dermatopathologist/Core 2 via REDCap Entry System |
| mit_index_na         | Flag for #/slide                     | Number Code | 1 = Lesion area does not permit assessment per mm2                                                                                                                                                                                                                                                                                                                                             |           |                                                                                                                                                                           | Dermatopathologist/Core 2 via REDCap Entry System |

**Supporting Table S1.** InterMEL: Participants and melanoma variables and definitions

| InterMEL Variable   | Definition                                                                                          | Value type  | Code                                                                                                | Required? | Notes                | Responsible Data Source                           |
|---------------------|-----------------------------------------------------------------------------------------------------|-------------|-----------------------------------------------------------------------------------------------------|-----------|----------------------|---------------------------------------------------|
| mit_index_slide     | Mitotic Index (#/slide)                                                                             | Number      |                                                                                                     |           |                      | Dermatopathologist/Core 2 via REDCap Entry System |
| ulceration          | Presence of ulceration - yes/no                                                                     | Number Code | 0 = Absent<br>1 = Present<br>3 = Indeterminate<br>99 = Cannot Assess                                |           |                      | Dermatopathologist/Core 2 via REDCap Entry System |
| TILs                | Tumor infiltrating lymphocytes                                                                      | Number Code | 1 = Brisk<br>2 = Non-brisk<br>3 = Absent<br>99 = Cannot assess                                      |           |                      | Dermatopathologist/Core 2 via REDCap Entry System |
| regression          | Regression                                                                                          | Number Code | 0 = Absent<br>1 = Present<br>99 = Cannot assess                                                     |           |                      | Dermatopathologist/Core 2 via REDCap Entry System |
| regression_loc      | Regression - Present                                                                                | Number Code | 1 = Papillary dermis<br>2 = Reticular dermis                                                        |           |                      | Dermatopathologist/Core 2 via REDCap Entry System |
| T_pigmentation_type | Presence of melanin pigment                                                                         | Number Code | 0 = Absent<br>1 = Present Lightly pigmented<br>2 = Present, Heavily pigmented<br>99 = Cannot assess |           |                      | Dermatopathologist/Core 2 via REDCap Entry System |
| T_pigmentation      | Pigmentation - Present (may specify, e.g., pigmented epithelioid cells or amelanotic spindle cells) | Text        |                                                                                                     |           |                      | Dermatopathologist/Core 2 via REDCap Entry System |
| T_nevus             | Presence of associated nevus                                                                        | Number Code | 0 = Absent<br>1 = Present<br>99 = Cannot assess                                                     |           |                      | Dermatopathologist/Core 2 via REDCap Entry System |
| satellites          | Satellites                                                                                          | Number Code | 0 = Absent<br>1 = Present<br>2 = Not applicable (Biopsy only)<br>99 = Cannot assess                 |           |                      | Dermatopathologist/Core 2 via REDCap Entry System |
| se                  | Solar Elastosis                                                                                     | Number Code | 0 = Absent<br>1 = Mild/Moderate<br>2 = Severe<br>88 = Cannot assess<br>99 = Unknown/ Missing        |           |                      | Dermatopathologist/Core 2 via REDCap Entry System |
| cell_type           | Cell Type                                                                                           | Text        |                                                                                                     |           |                      | Dermatopathologist/Core 2 via REDCap Entry System |
| purity              | Purity                                                                                              | Text        |                                                                                                     |           |                      | Dermatopathologist/Core 2 via REDCap Entry System |
| pni                 | Perineural Invasion (PNI)                                                                           | Number Code | 1 = Present<br>0 = Absent                                                                           |           | Added 1/23           | Dermatopathologist/Core 2 via REDCap Entry System |
| path_notes          | Pathology Assessment Notes                                                                          | Note Field  |                                                                                                     |           | Any additional notes | Dermatopathologist/Core 2 via REDCap Entry System |
